# Supplementary material
Source: PubMed Central journal article supplement (PMC3567250)

## Supporting Information

**Figure S1.** Fit of the linear portion of the product versus time curves for the reaction of Met471Cys T $\beta$ M with varying concentrations of tyramine; 3.0  $\mu$ M Met471Cys T $\beta$ M, 50 mM KPi, pH 6, 35  $^{\circ}$ C, 100 mM KCl, 100  $\mu$ g/mL catalase, 50 mM ascorbate, 15  $\mu$ M CuSO<sub>4</sub>. ( $\circ$ ) 100  $\mu$ M tyramine (A), ( $\square$ ) 250  $\mu$ M tyramine (B), ( $\diamond$ ) 500  $\mu$ M tyramine (C), ( $\times$ ) 1 mM tyramine (D), (+) 2 mM tyramine (E), ( $\Delta$ ) 5 mM tyramine (F), and ( $\bullet$ ) 8 mM tyramine (G). Best fit lines generated by Kaleidagraph.

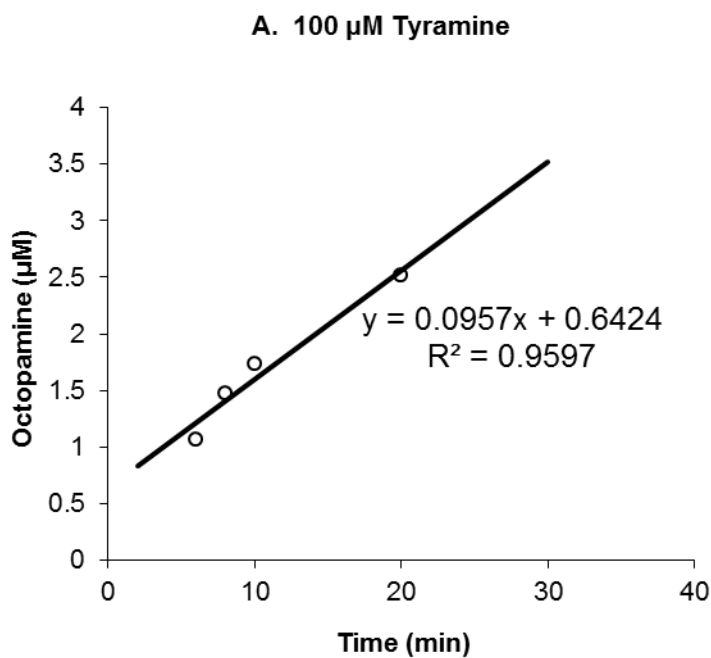

**B. 250  $\mu\text{M}$  Tyramine**

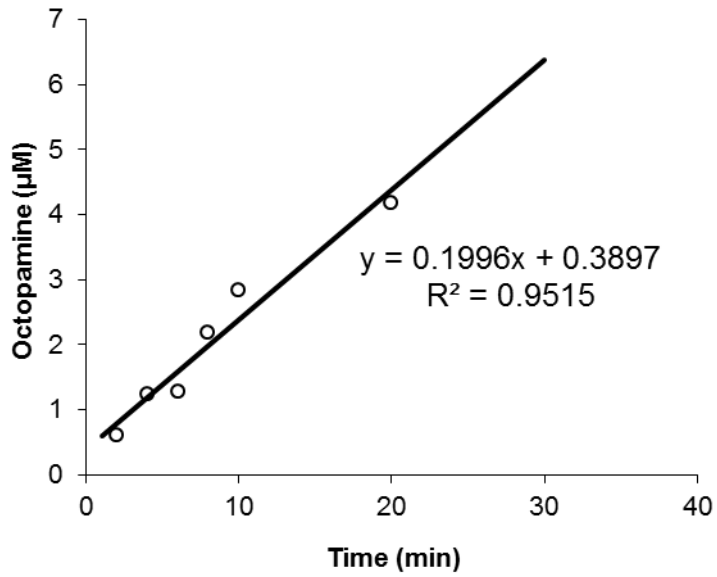

**C. 500  $\mu\text{M}$  Tyramine**

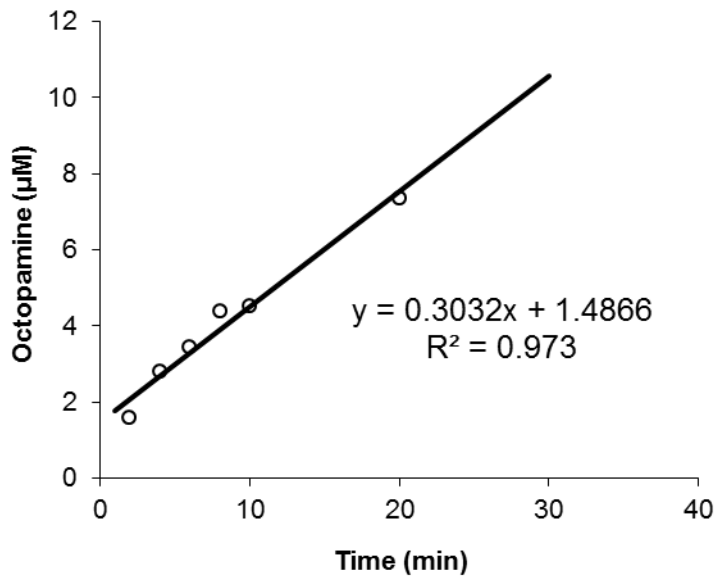

**D. 1 mM Tyramine**

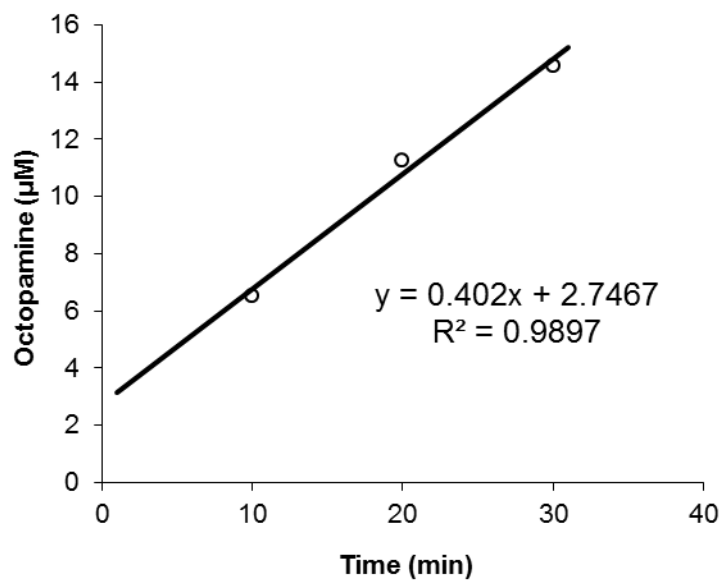

**E. 2 mM Tyramine**

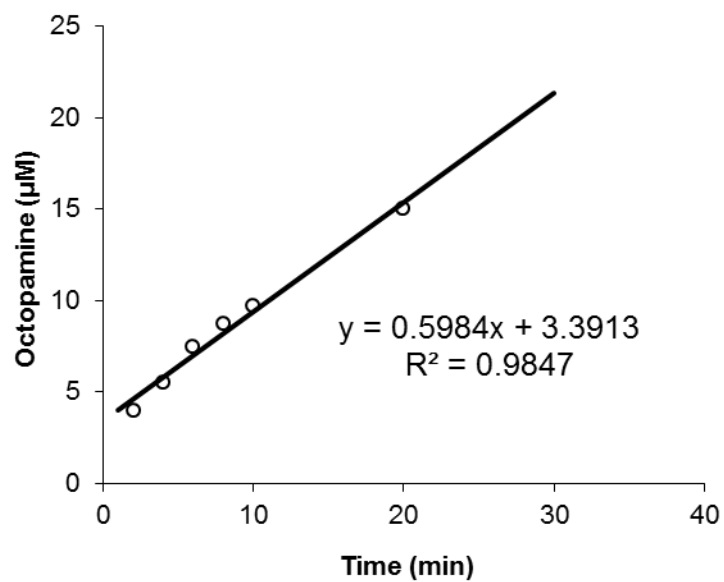

**F. 5 mM Tyramine**

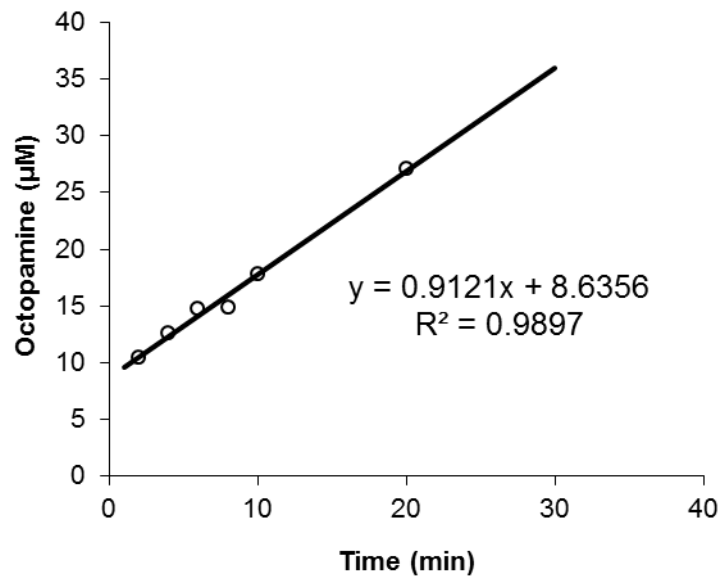

**G. 8 mM Tyramine**

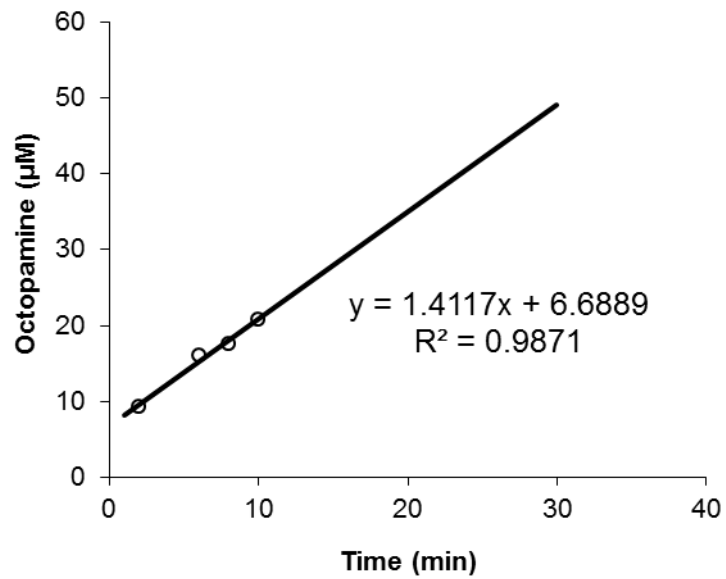

**Figure S2.** Plot of [octopamine] versus time. For these assays, Met471Cys T $\beta$ M was incubated with all assay components (i.e. 100 mM KPi, pH 6.0, 100 mM KCl, 50 mM ascorbate, and 100  $\mu$ g/mL catalase, 1 mM tyramine) ( $\circ$ ). Plots of Met471Cys T $\beta$ M incubated with 100 mM KPi, pH 6.0, 100 mM KCl, 50 mM ascorbate, and 100  $\mu$ g/mL catalase, (no tyramine) for 2 ( $\square$ ) and 4 ( $\diamond$ ) hours, respectively, before the addition of 1 mM tyramine. After the incubation time with tyramine was complete, end-point assays were performed and product versus time curve generated.

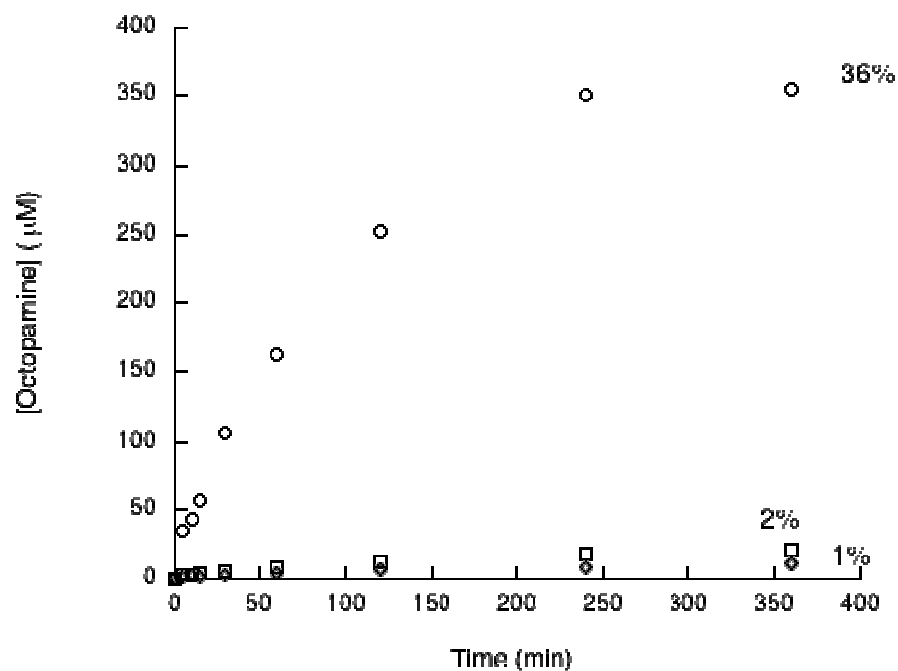

**Figure S3.** Fit of the linear regions of the product versus time curves for the reaction of Met471Cys T $\beta$ M with tyramine as a function of incubation time. For these assays Met471Cys T $\beta$ M was incubated at RT (ca. 23 °C) with 100 mM KPi, pH 6.0, 100 mM KCl, 50 mM ascorbate, and 100  $\mu$ g/mL catalase, (no tyramine) for 0 ( $\circ$ ), 15 ( $\square$ ), 30 ( $\diamond$ ), and 45 ( $\times$ ) minutes before the addition of 1 mM tyramine. After the incubation time was complete, end-point assays were executed at 35 °C and product versus time curves generated in order to determine a  $k_{\text{obs}}$  as a function of incubation time.

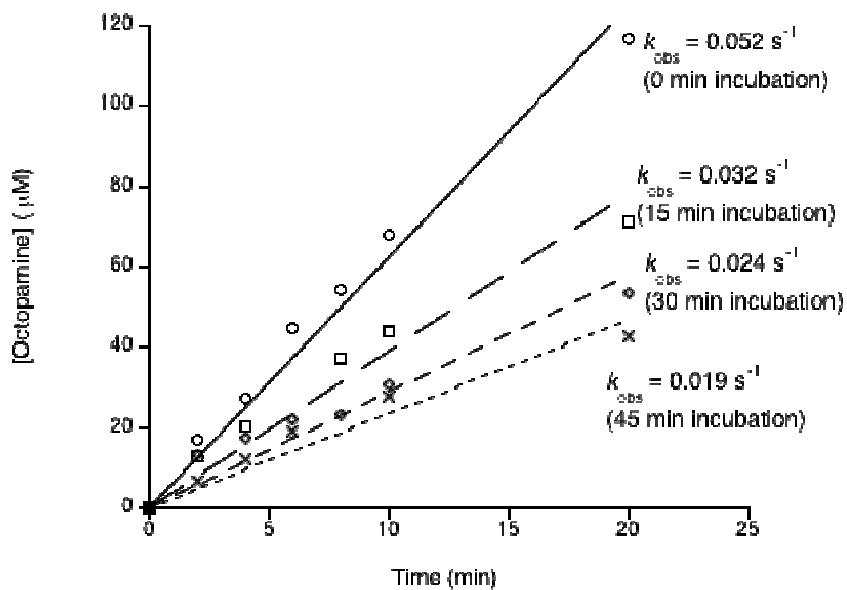

Supplement: NIHMS407746-supplement-1_si_001.pdf [file NIHMS407746-supplement-1_si_001.pdf]
